# Supplementary material for: Map-based prediction of organic carbon in headwater streams improved by downstream observations from the river outlet
Source: Copernicus journal article supplement (doi:10.5194/bg-13-399-2016), 2016-01-21
Supplement: Supplementary file 1 [file bg-13-399-2016-supplement.pdf]

Supplement of Biogeosciences, 13, 399–413, 2016  
<http://www.biogeosciences.net/13/399/2016/>  
doi:10.5194/bg-13-399-2016-supplement  
© Author(s) 2016. CC Attribution 3.0 License.

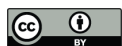

Biogeosciences  Open Access

*Supplement of*

## **Map-based prediction of organic carbon in headwater streams improved by downstream observations from the river outlet**

**J. Temnerud et al.**

*Correspondence to:* J. Temnerud ([johan.temnerud@slu.se](mailto:johan.temnerud@slu.se))

The copyright of individual parts of the supplement might differ from the CC-BY 3.0 licence.

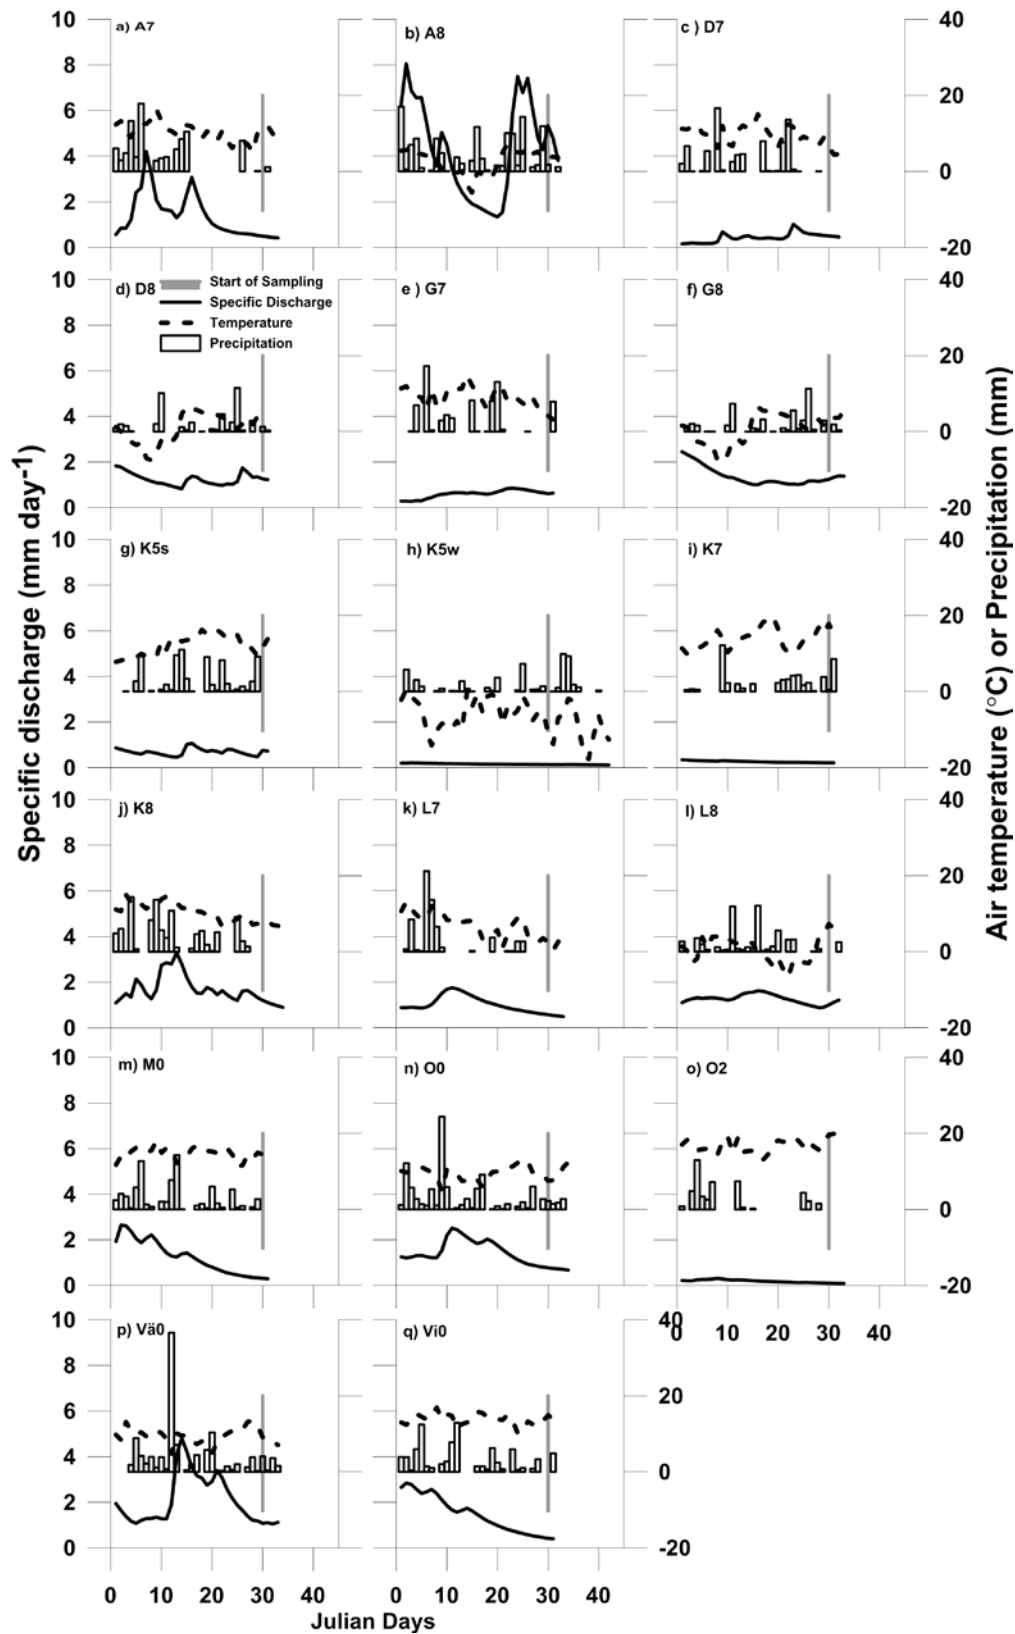

Fig. S1. Modelled daily specific discharge, mean air temperature, and precipitation for each catchment outlet, for the 30 days prior to the respective sampling. Start of sampling is indicated by the grey vertical line. a) is sampling A7, b) is A8, c) is D7, d) is D8, e) is G7, f) is G8, g) is K5s, h) is K5w, i) is K7, j) is K8, k) is L7, l) is L8, m) is M0, n) is O0, o) is O2, p) is Vå0 and q) is Vi0. See the Methods section for more details.

Table S1. Median values for headwater (HW) catchments, and the value for the entire mesoscale catchment as defined by the outlet (Out). Data includes elevation (Elev) median and interquartile range (IQR) for the catchment, altitude of sampling sites, proportion of land-use (CORINE), tree stand data (kNN), and proportion of soil and surficial geology type. See Table 1 for river names. For CORINE classes a short-name was given, for details see: <http://www.eea.europa.eu/publications/CORO-landcover>. Index B is *Betula spp.*, S is Norway spruce (*Picea abies*), P is Scots pine (*Pinus sylvestris*), and the unit for tree classes is m<sup>3</sup> ha<sup>-1</sup>. Tree age is the age of the forest stand (years) and Tree height is the average height of the forest. 0.00 is a rounding effect, while no value means that the median value is null.

| River Group                  | A HW | A Out | D HW | D Out | G HW | G Out | K HW | K Out | L HW | L Out | M HW | M Out | O HW | O Out | Vä HW | Vä Out | Vi HW | Vi Out |
|------------------------------|------|-------|------|-------|------|-------|------|-------|------|-------|------|-------|------|-------|-------|--------|-------|--------|
| Elev median (m a.s.l.)       | 129  | 109   | 244  | 212   | 319  | 269   | 282  | 244   | 245  | 220   | 408  | 375   | 248  | 235   | 406   | 366    | 453   | 411    |
| Elev IQR                     | 18   | 50    | 26   | 60    | 11   | 38    | 35   | 91    | 14   | 37    | 51   | 116   | 15   | 42    | 34    | 96     | 50    | 97     |
| Sites altitude               | 95   | 88    | 212  | 206   | 294  | 280   | 233  | 198   | 228  | 205   | 385  | 307   | 230  | 223   | 362   | 352    | 381   | 368    |
| <b>CORINE</b>                |      |       |      |       |      |       |      |       |      |       |      |       |      |       |       |        |       |        |
| Agricultural                 |      | 0.09  |      | 0.01  |      | 0.00  |      | 0.02  | 0.02 | 0.06  |      | 0.00  |      | 0.02  |       | 0.00   |       | 0.00   |
| Pasture                      | 0.01 | 0.04  |      | 0.00  |      | 0.00  |      | 0.00  | 0.01 | 0.04  |      | 0.00  |      | 0.01  |       | 0.01   |       | 0.00   |
| Broad-leaved forest          | 0.01 | 0.07  |      | 0.02  |      | 0.01  |      | 0.02  | 0.00 | 0.04  | 0.01 | 0.02  | 0.01 | 0.02  | 0.03  | 0.05   | 0.04  | 0.04   |
| Coniferous forest            | 0.68 | 0.53  | 0.68 | 0.62  | 0.59 | 0.58  | 0.71 | 0.65  | 0.63 | 0.59  | 0.83 | 0.70  | 0.49 | 0.49  | 0.60  | 0.56   | 0.71  | 0.64   |
| Mixed forest                 | 0.09 | 0.10  | 0.09 | 0.08  | 0.00 | 0.06  | 0.03 | 0.08  | 0.04 | 0.05  | 0.04 | 0.04  | 0.06 | 0.08  | 0.11  | 0.08   | 0.09  | 0.08   |
| Clear-felled                 | 0.04 | 0.06  | 0.13 | 0.14  | 0.16 | 0.19  | 0.03 | 0.13  | 0.10 | 0.09  | 0.04 | 0.09  | 0.13 | 0.16  | 0.05  | 0.13   | 0.04  | 0.11   |
| Wet mires                    | 0.00 | 0.02  |      | 0.02  | 0.03 | 0.04  | 0.03 | 0.02  |      | 0.01  | 0.02 | 0.08  | 0.03 | 0.05  | 0.05  | 0.09   | 0.05  | 0.08   |
| Broad-leaved forest on mires |      | 0.00  |      | 0.00  |      | 0.00  |      | 0.00  |      | 0.00  |      | 0.00  | 0.01 | 0.01  |       | 0.01   |       | 0.00   |
| Coniferous forest on mires   |      | 0.02  | 0.01 | 0.03  |      | 0.02  | 0.11 | 0.05  | 0.04 | 0.04  |      | 0.03  | 0.13 | 0.12  | 0.03  | 0.04   |       | 0.02   |
| Mixed forest on mires        |      | 0.00  |      | 0.00  |      | 0.00  |      | 0.00  |      | 0.00  | 0.00 | 0.00  | 0.00 | 0.01  |       | 0.00   |       | 0.00   |
| Lake surface                 |      | 0.07  |      | 0.07  |      | 0.10  |      | 0.01  | 0.04 | 0.09  |      | 0.03  | 0.01 | 0.04  |       | 0.01   |       | 0.03   |
| <b>kNN data</b>              |      |       |      |       |      |       |      |       |      |       |      |       |      |       |       |        |       |        |
| Tree age (year)              | 42   | 35    | 51   | 44    | 45   | 39    | 59   | 53    | 41   | 38    | 36   | 35    | 45   | 47    | 39    | 42     | 33    | 36     |
| Tree height (m)              | 12   | 10    | 13   | 11    | 10   | 9     | 10   | 9     | 12   | 11    | 10   | 9     | 8    | 8     | 7     | 7      | 9     | 8      |
| Birch <sup>B</sup> (m3/ha)   | 17   | 18    | 11   | 12    | 7    | 8     | 13   | 12    | 14   | 14    | 14   | 13    | 13   | 14    | 14    | 13     | 15    | 12     |
| Pine <sup>P</sup> (m3/ha)    | 47   | 39    | 65   | 60    | 62   | 60    | 56   | 50    | 41   | 40    | 22   | 30    | 32   | 29    | 21    | 26     | 22    | 33     |
| Other Trees (m3/ha)          | 3    | 5     | 2    | 3     | 1    | 2     | 1    | 1     | 4    | 4     | 3    | 3     | 1    | 1     | 2     | 2      | 3     | 2      |
| Spruce <sup>S</sup> (m3/ha)  | 72   | 59    | 70   | 58    | 39   | 35    | 55   | 32    | 92   | 86    | 56   | 50    | 42   | 40    | 28    | 28     | 42    | 38     |
| Total Tree (m3/ha)           | 138  | 117   | 158  | 131   | 113  | 103   | 116  | 95    | 152  | 142   | 102  | 94    | 89   | 82    | 66    | 68     | 85    | 84     |
| <b>Soil type</b>             |      |       |      |       |      |       |      |       |      |       |      |       |      |       |       |        |       |        |
| Peat                         |      | 0.01  |      | 0.03  |      |       |      | 0.01  |      | 0.01  |      | 0.04  |      | 0.16  |       | 0.05   |       | 0.05   |
| Clay                         |      | 0.12  |      |       |      |       |      |       |      | 0.02  |      |       |      | 0.08  |       |        |       |        |
| Coarse                       |      | 0.00  |      | 0.02  |      |       |      | 0.26  |      |       |      |       |      |       |       |        |       |        |
| Glaciofluvial                |      | 0.02  |      |       |      |       |      | 0.12  |      | 0.03  |      | 0.04  |      | 0.00  |       | 0.01   |       | 0.02   |
| Till                         |      |       | 0.95 | 0.82  | 1.00 | 1.00  | 1.00 | 0.46  | 0.60 | 0.57  | 1.00 | 0.83  | 0.86 | 0.67  | 1.00  | 0.91   | 1.00  | 0.84   |
| Bare rock                    | 1.00 | 0.85  | 0.05 | 0.13  |      |       |      | 0.14  | 0.37 | 0.34  |      | 0.09  |      | 0.07  |       | 0.02   |       | 0.08   |
| <b>Geology</b>               |      |       |      |       |      |       |      |       |      |       |      |       |      |       |       |        |       |        |
| Diabase                      |      |       |      |       |      |       |      |       |      |       |      | 0.19  |      |       |       |        |       | 0.19   |
| Granite                      | 1.00 | 0.74  | 1.00 | 0.54  | 1.00 | 0.99  |      | 0.03  | 0.50 | 0.49  |      |       |      | 0.14  | 1.00  | 0.58   |       |        |
| Mafic gabbro                 |      |       |      |       |      |       |      |       |      | 0.11  |      |       |      |       |       |        |       |        |

|                 |      |      |      |      |      |      |      |      |      |      |      |
|-----------------|------|------|------|------|------|------|------|------|------|------|------|
| Gneiss          | 0.26 |      |      |      |      | 1.00 | 0.80 |      |      | 1.00 | 0.81 |
| Acid volcanics  |      | 0.44 | 0.01 |      | 0.21 | 0.37 |      | 0.01 |      |      |      |
| Mafic volcanics |      |      |      |      | 0.06 |      |      |      |      |      | 0.14 |
| Slate           |      |      |      | 1.00 | 0.90 |      |      |      | 1.00 | 0.86 | 0.28 |
| Limestone       |      | 0.02 |      |      |      |      |      |      |      |      |      |

---

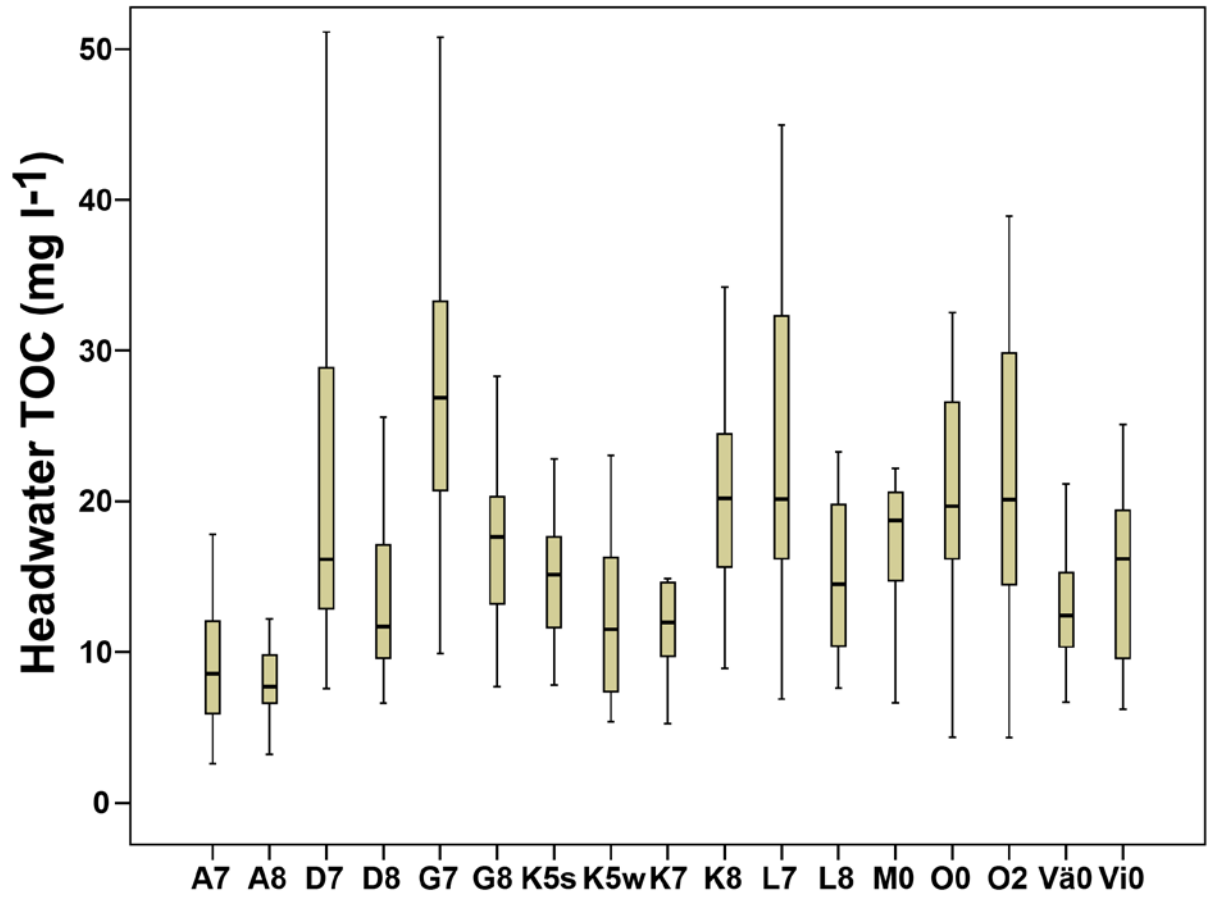

Fig. S2. Box-plot of total organic carbon (TOC) concentrations in headwaters for each survey.

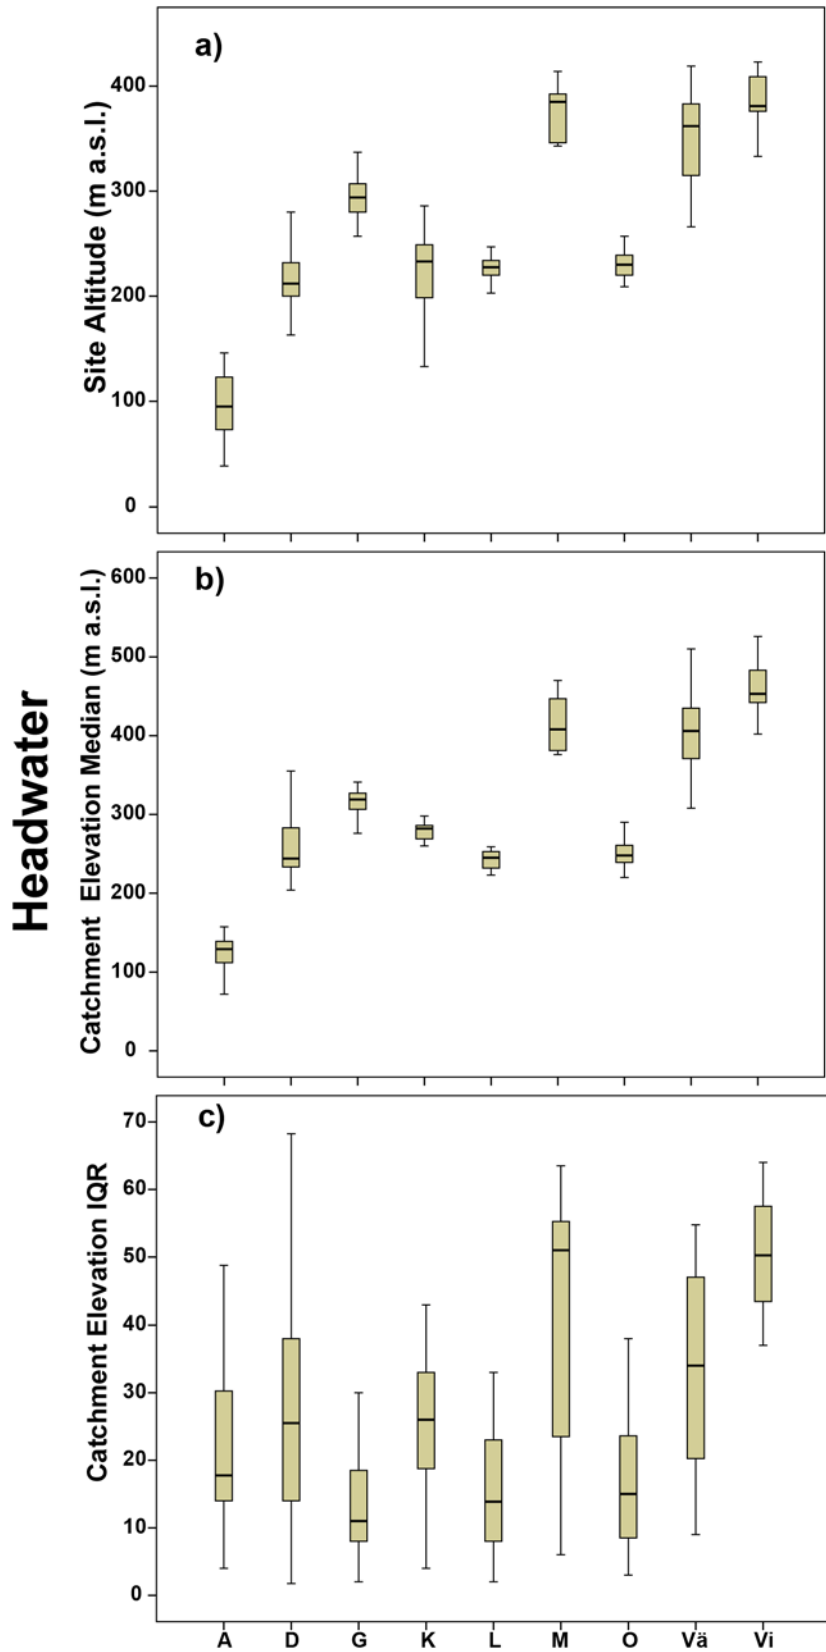

Fig. S3. Box-plot of headwaters site altitude (a) and catchment elevation (m a.s.l.) median (b) and interquartile range (IQR) (c). Please note different scale of the y-axis.

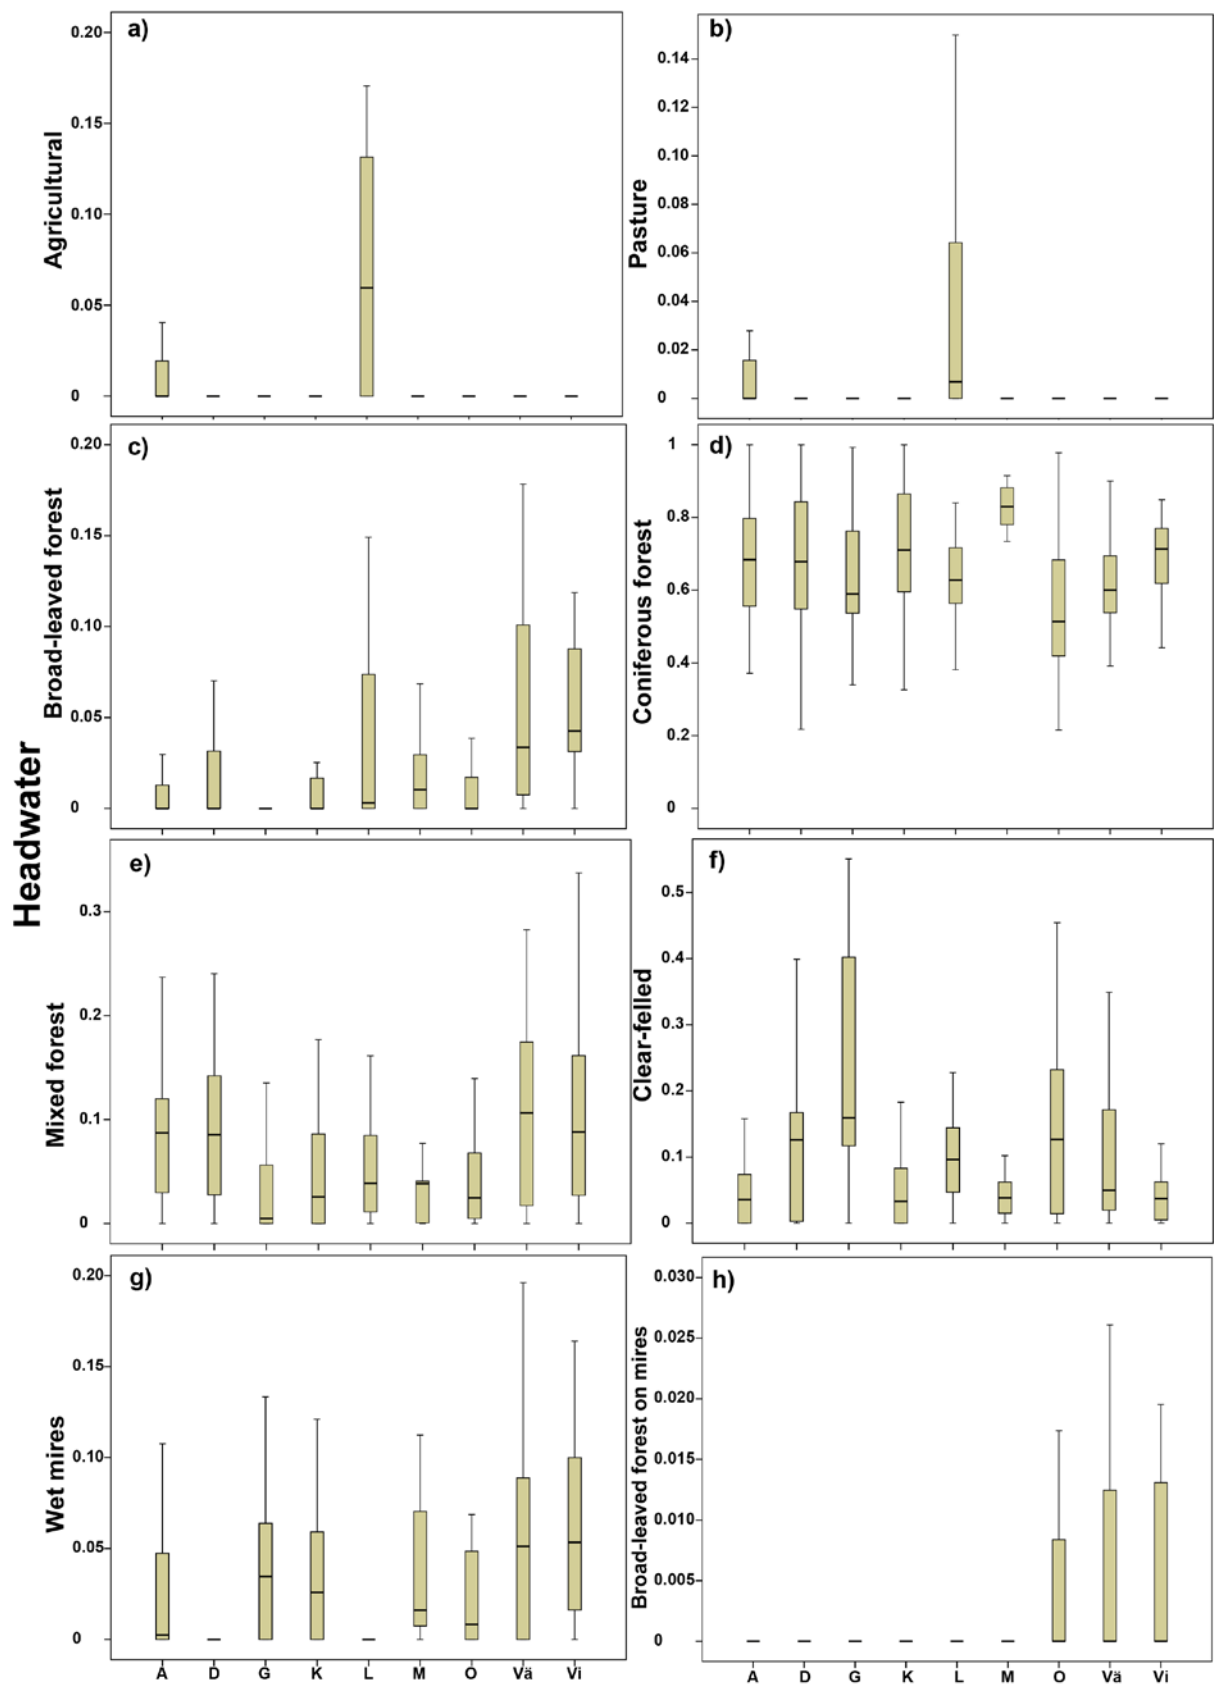

Fig. S4. Box-plot of headwaters catchment proportion in different land-use/land cover: a) Agricultural, b) Pasture, c) Broad-leaved forest, d) Coniferous forest, e) Mixed forest, f)

Clear-felled, g) Wet mires, h) Broad-leaved forest on mires. Please note different scale of the y-axis.



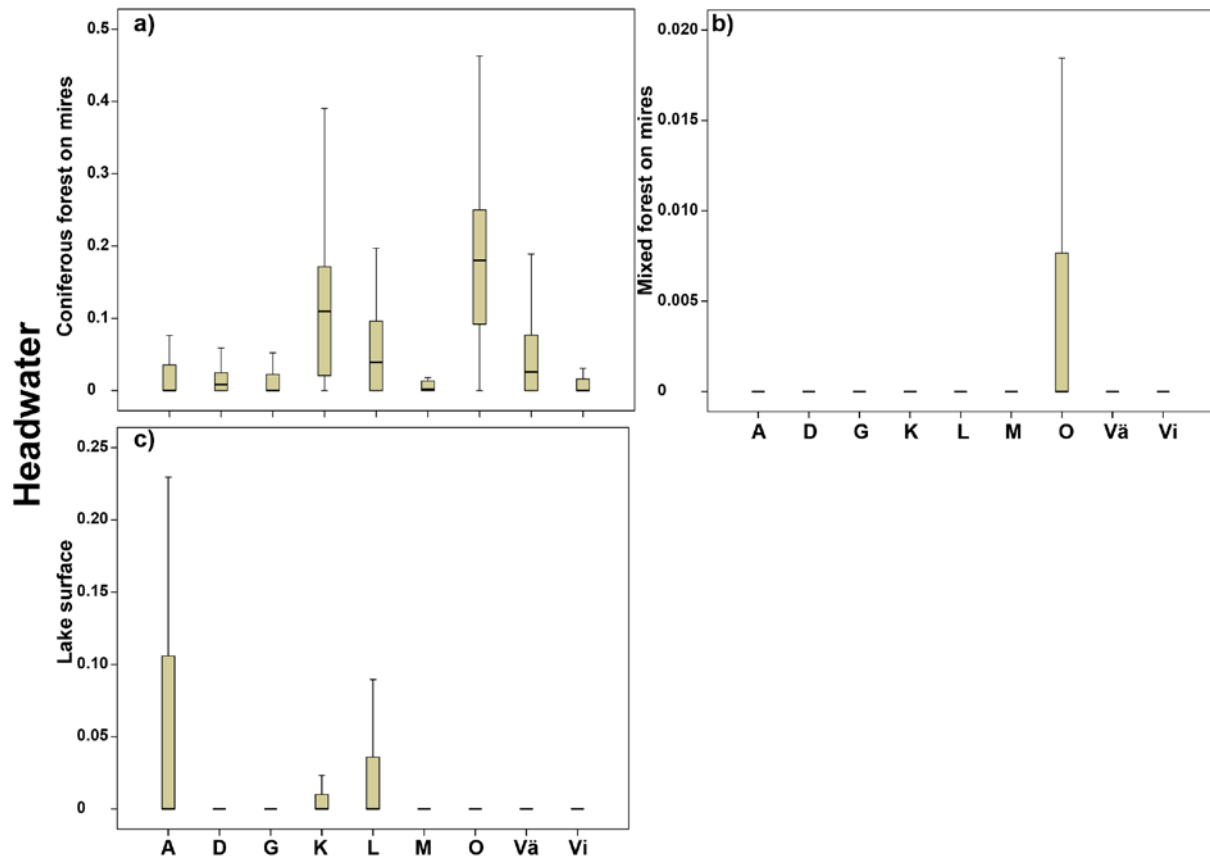

Fig. S5. Box-plot of headwaters proportion of land-use: a) Coniferous forest on mires, b) Mixed forest on mires, c) Lake surface. Please note different scale of the y-axis.

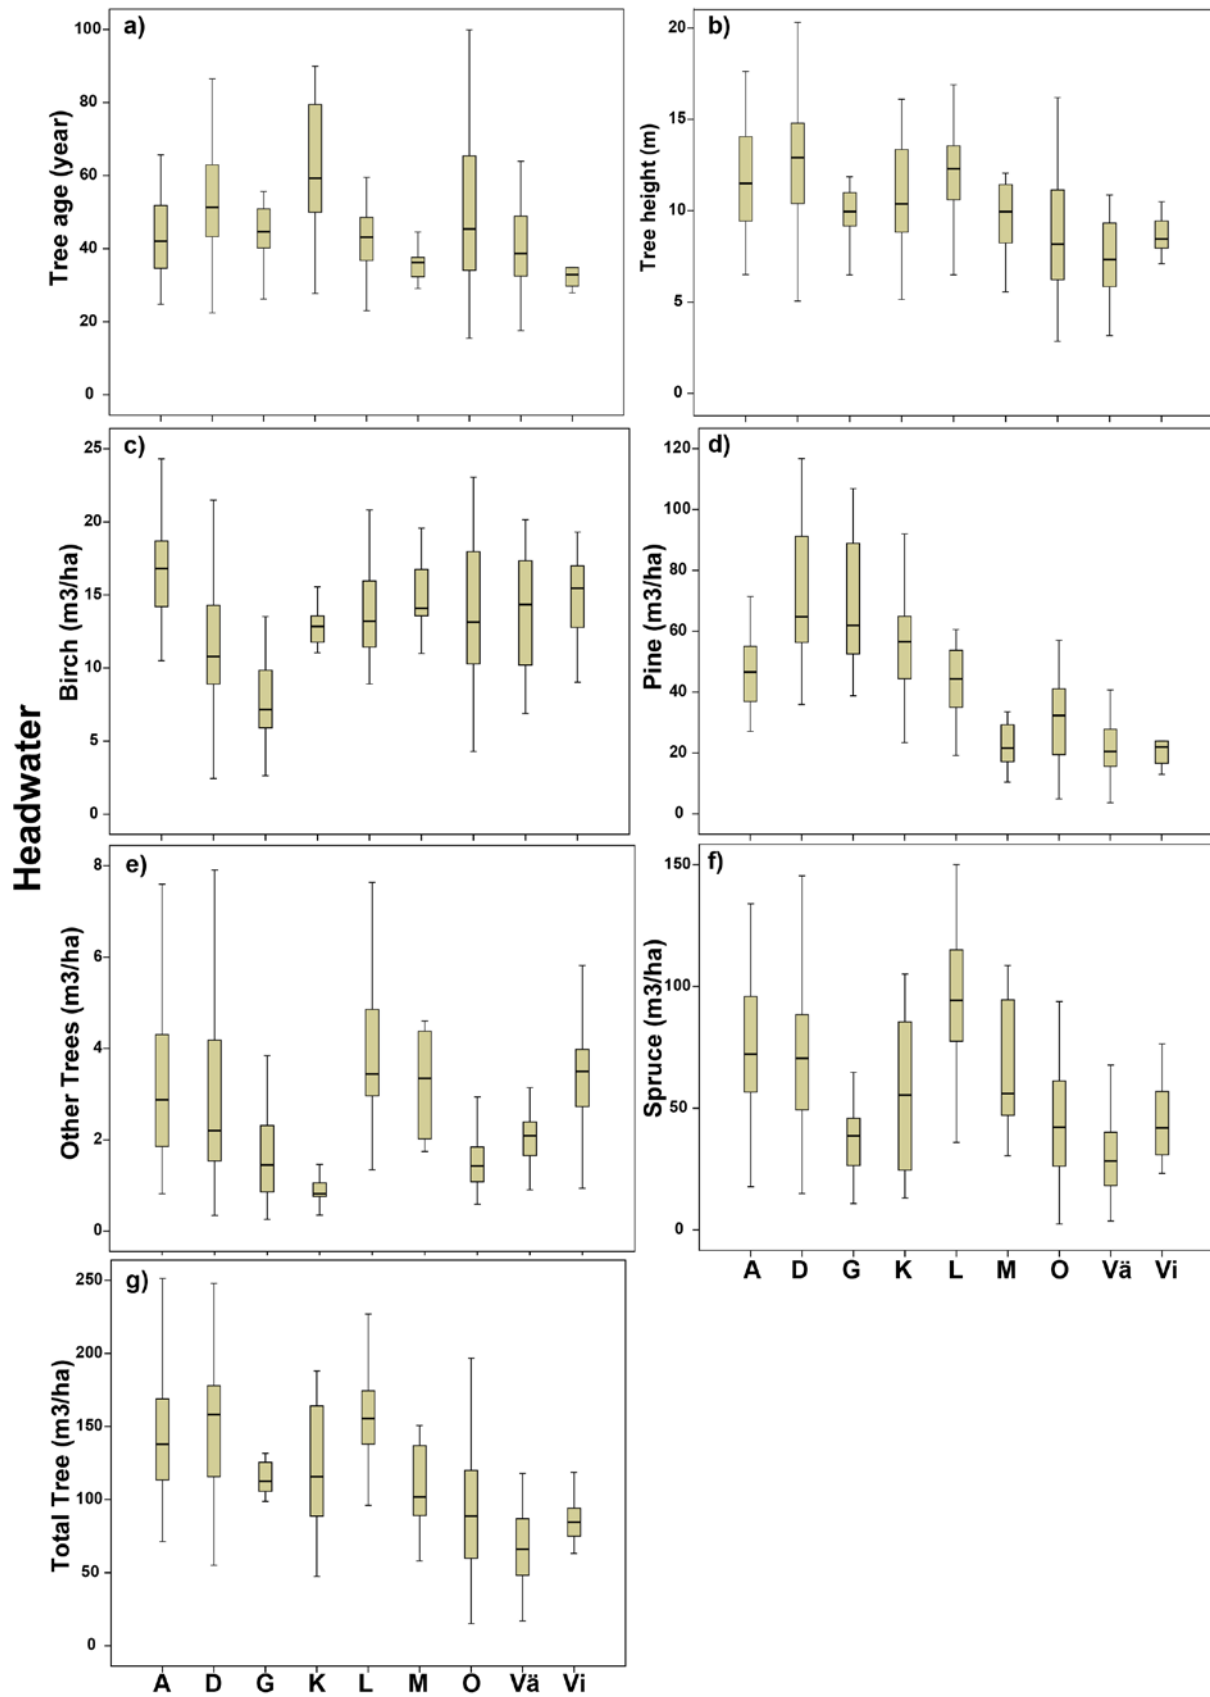

Fig. S6. Box-plot of headwaters proportion of vegetation: a) Tree age (year), b) Tree height (m), c) Birch (m3/ha), d) Pine (m3/ha), e) Other Trees (m3/ha), f) Spruce (m3/ha), g) Total Tree (m3/ha). Please note different scale of the y-axis.



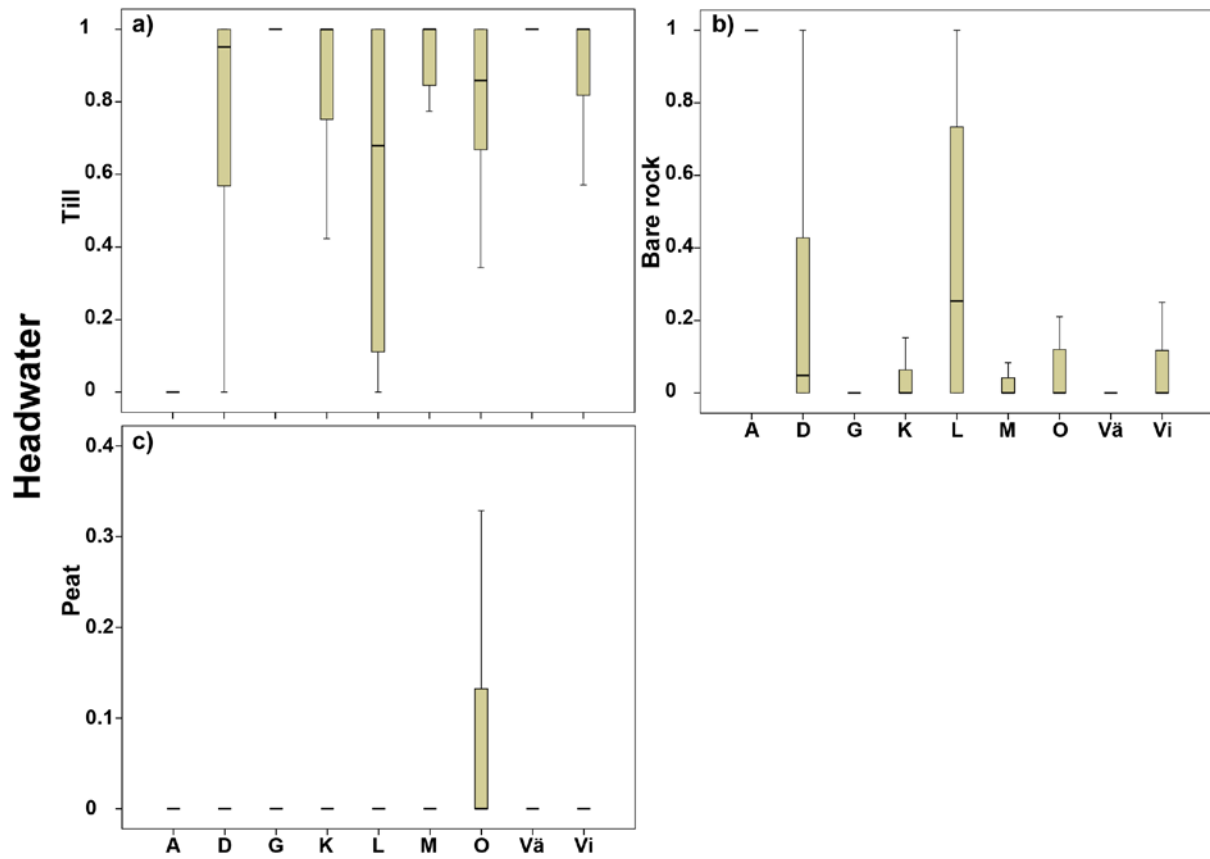

Fig. S7. Box-plot of headwaters proportion of soil type: a) Till, b) Bare rock, c) Peat. Please note different scale of the y-axis.

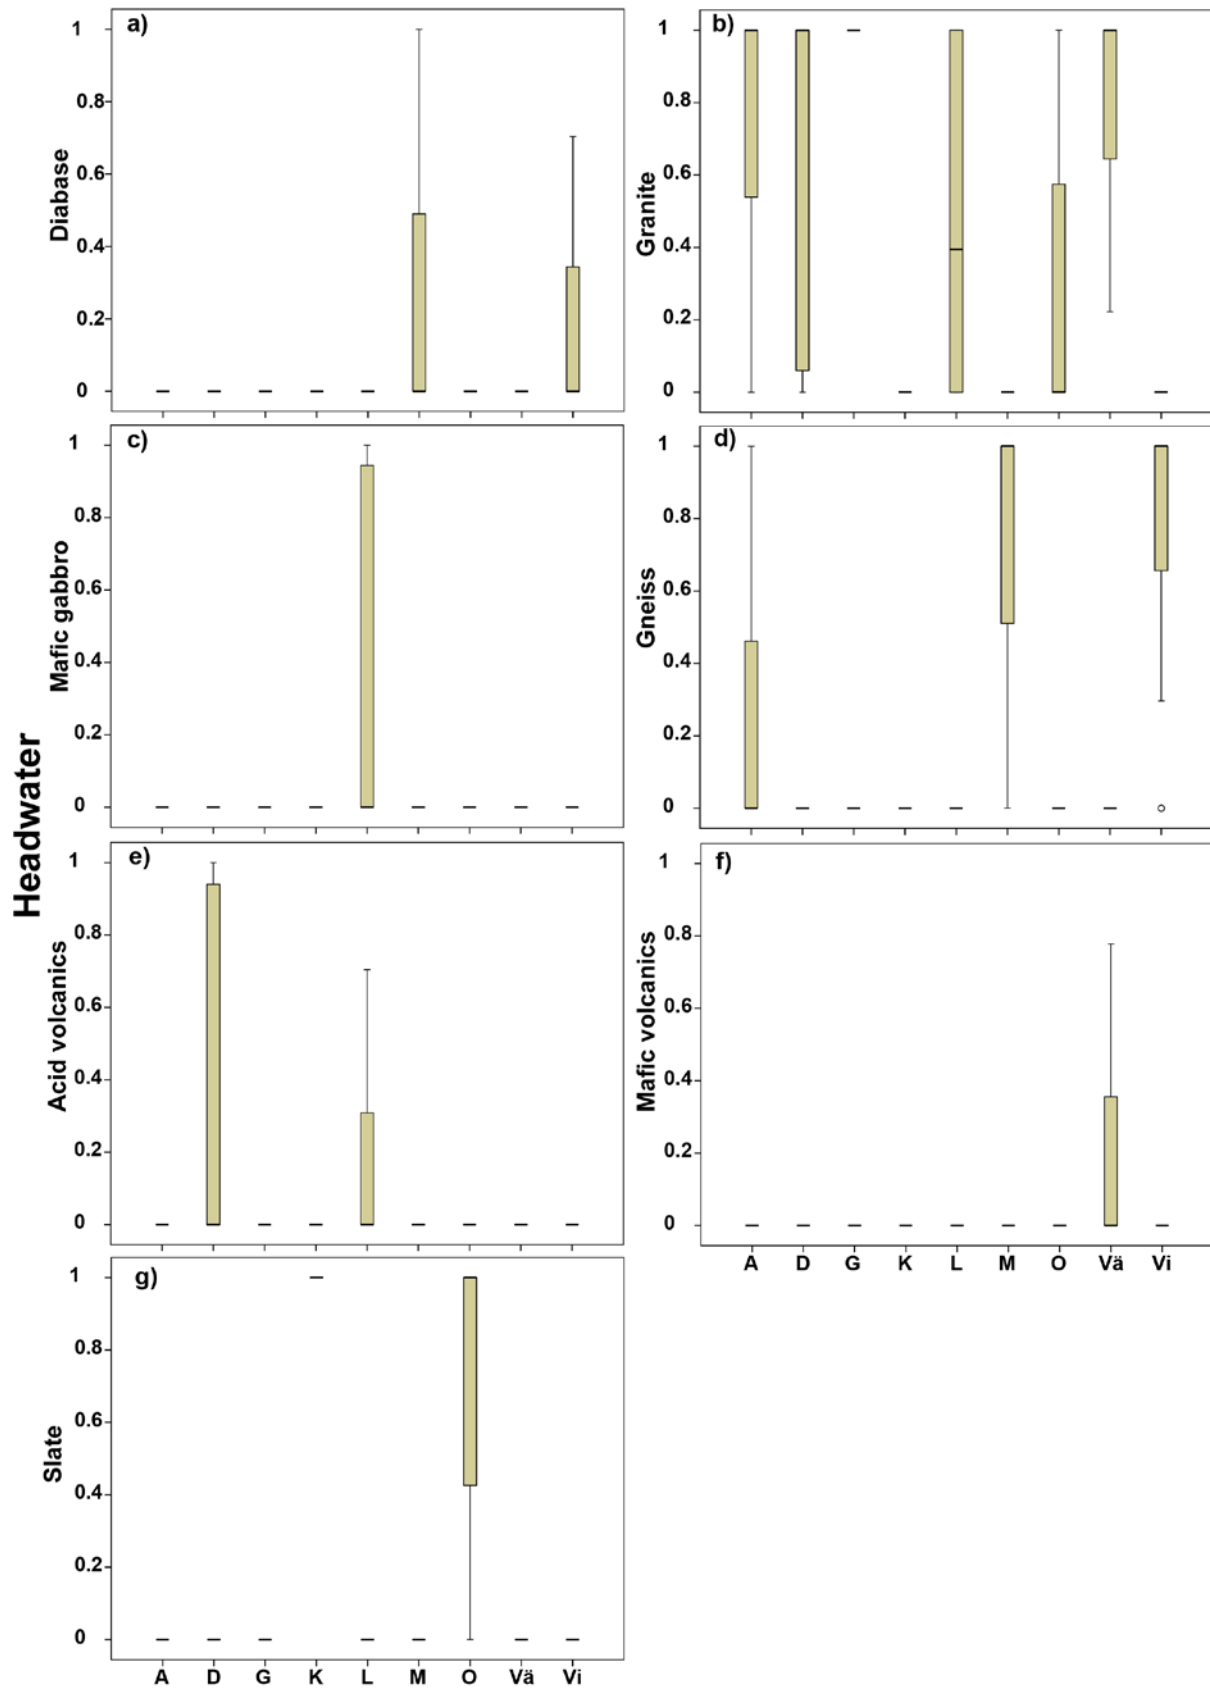

Fig. S8. Box-plot of headwaters proportion of bedrock parent material: a) Diabase, b) Granite, c) Mafic gabbro, d) Gneiss, e) Acid volcanics, f) Mafic volcanics, g) Slate.
